# Supplementary material for: An Audit and Feedback Intervention for Reducing Antibiotic Prescribing in General Dental Practice: The RAPiD Cluster Randomised Controlled Trial
Source: PubMed Central journal article supplement (PMC5004857; doi:10.1371/journal.pmed.1002115), 2016-08-30
Supplement: pmed.1002115.s004.pdf [file pmed.1002115.s004.pdf]

## S2 Text. CONSORT 2010 checklist of information to include when reporting a cluster randomised trial

Table 1: CONSORT Checklist 2010

| Section/Topic                    | Item No | Standard Checklist item                                                                                                       | Extension for cluster designs                                                                 | Page No *                                                                                                                             |
|----------------------------------|---------|-------------------------------------------------------------------------------------------------------------------------------|-----------------------------------------------------------------------------------------------|---------------------------------------------------------------------------------------------------------------------------------------|
| <b>Title and abstract</b>        |         |                                                                                                                               |                                                                                               |                                                                                                                                       |
|                                  | 1a      | Identification as a randomised trial in the title                                                                             | Identification as a cluster randomised trial in the title                                     | Title Page                                                                                                                            |
|                                  | 1b      | Structured summary of trial design, methods, results, and conclusions (for specific guidance see CONSORT for abstracts) [1,2] | See Table 2                                                                                   | Abstract                                                                                                                              |
| <b>Introduction</b>              |         |                                                                                                                               |                                                                                               |                                                                                                                                       |
| <b>Background and objectives</b> | 2a      | Scientific background and explanation of rationale                                                                            | Rationale for using a cluster design                                                          | Methods: Trial design, paragraphs 1 and 3                                                                                             |
|                                  | 2b      | Specific objectives or hypotheses                                                                                             | Whether objectives pertain to the the cluster level, the individual participant level or both | Introduction: paragraph 6                                                                                                             |
| <b>Methods</b>                   |         |                                                                                                                               |                                                                                               |                                                                                                                                       |
| <b>Trial design</b>              | 3a      | Description of trial design (such as parallel, factorial) including allocation ratio                                          | Definition of cluster and description of how the design features apply to the clusters        | Methods: Trial Design and Fig 1                                                                                                       |
|                                  | 3b      | Important changes to methods after trial commencement (such as eligibility criteria), with reasons                            |                                                                                               | No change to methods but change in classification of some ordinary lists in MIDAS was taken account of after the 6 month intervention |
| <b>Participants</b>              | 4a      | Eligibility criteria for participants                                                                                         | Eligibility criteria for clusters                                                             | Methods: Study population and eligibility, paragraph 2                                                                                |
|                                  | 4b      | Settings and locations where the data were collected                                                                          |                                                                                               | Methods: Study population and eligibility, paragraph 1                                                                                |

| Section/Topic                           | Item No | Standard Checklist item                                                                                                                                                                     | Extension for cluster designs                                                                                                                                                                                      | Page No *                                                                                 |
|-----------------------------------------|---------|---------------------------------------------------------------------------------------------------------------------------------------------------------------------------------------------|--------------------------------------------------------------------------------------------------------------------------------------------------------------------------------------------------------------------|-------------------------------------------------------------------------------------------|
| <b>Methods</b>                          |         |                                                                                                                                                                                             |                                                                                                                                                                                                                    |                                                                                           |
| <b>Interventions</b>                    | 5       | The interventions for each group with sufficient details to allow replication, including how and when they were actually administered                                                       | Whether interventions pertain to the cluster level, the individual participant level or both                                                                                                                       | Methods:<br>Intervention development;<br>and<br>Intervention delivery<br>See also S1 Text |
|                                         | 6a      | Completely defined pre-specified primary and secondary outcome measures, including how and when they were assessed                                                                          | Whether outcome measures pertain to the cluster level, the individual participant level or both                                                                                                                    | Methods:<br>Outcomes                                                                      |
|                                         | 6b      | Any changes to trial outcomes after the trial commenced, with reasons                                                                                                                       |                                                                                                                                                                                                                    | N/A                                                                                       |
| <b>Sample size</b>                      | 7a      | How sample size was determined                                                                                                                                                              | Method of calculation, number of clusters(s) (and whether equal or unequal cluster sizes are assumed), cluster size, a coefficient of intracluster correlation (ICC or $k$ ), and an indication of its uncertainty | Methods:<br>Sample size                                                                   |
|                                         | 7b      | When applicable, explanation of any interim analyses and stopping guidelines                                                                                                                |                                                                                                                                                                                                                    | N/A                                                                                       |
| <b>Randomisation</b>                    |         |                                                                                                                                                                                             |                                                                                                                                                                                                                    |                                                                                           |
| <b>Sequence generation</b>              | 8a      | Method used to generate the random allocation sequence                                                                                                                                      |                                                                                                                                                                                                                    | Methods:<br>Randomisation and allocation                                                  |
|                                         | 8b      | Type of randomisation; details of any restriction (such as blocking and block size)                                                                                                         | Details of stratification or matching if used                                                                                                                                                                      | Methods:<br>Randomisation and allocation                                                  |
| <b>Allocation concealment mechanism</b> | 9       | Mechanism used to implement the random allocation sequence (such as sequentially numbered containers), describing any steps taken to conceal the sequence until interventions were assigned | Specification that allocation was based on clusters rather than individuals and whether allocation concealment (if any) was at the cluster level, the individual participant level or both                         | Methods:<br>Randomisation and allocation                                                  |

| Section/Topic                 | Item No | Standard Checklist item                                                                                                                  | Extension for cluster designs                                                                                                                                       | Page No *                                  |
|-------------------------------|---------|------------------------------------------------------------------------------------------------------------------------------------------|---------------------------------------------------------------------------------------------------------------------------------------------------------------------|--------------------------------------------|
| <b>Randomisation (cont'd)</b> |         |                                                                                                                                          |                                                                                                                                                                     |                                            |
| <b>Implementation</b>         | 10      | Who generated the random allocation sequence, who enrolled participants, and who assigned participants to interventions                  | Replace by 10a, 10b and 10c                                                                                                                                         |                                            |
|                               | 10a     |                                                                                                                                          | Who generated the random allocation sequence, who enrolled clusters, and who assigned clusters to interventions                                                     | Methods: Randomisation and allocation      |
|                               | 10b     |                                                                                                                                          | Mechanism by which individual participants were included in clusters for the purposes of the trial (such as complete enumeration, random sampling)                  | Methods: Randomisation and allocation      |
|                               | 10c     |                                                                                                                                          | From whom consent was sought (representatives of the cluster, or individual cluster members, or both), and whether consent was sought before or after randomisation | N/A                                        |
| <b>Blinding</b>               |         |                                                                                                                                          |                                                                                                                                                                     |                                            |
|                               | 11a     | If done, who was blinded after assignment to interventions (for example, participants, care providers, those assessing outcomes) and how |                                                                                                                                                                     | Methods: Randomisation and Allocation      |
|                               | 11b     | If relevant, description of the similarity of interventions                                                                              |                                                                                                                                                                     | N/A                                        |
| <b>Statistical methods</b>    |         |                                                                                                                                          |                                                                                                                                                                     |                                            |
|                               | 12a     | Statistical methods used to compare groups for primary and secondary outcomes                                                            | How clustering was taken into account                                                                                                                               | Methods: Statistical analysis              |
|                               | 12b     | Methods for additional analyses, such as subgroup analyses and adjusted analyses                                                         |                                                                                                                                                                     | Methods: Statistical analysis, paragraph 2 |

| Section/Topic                                               | Item No | Standard Checklist item                                                                                                                           | Extension for cluster designs                                                                                                               | Page No *                                                                                                                                 |
|-------------------------------------------------------------|---------|---------------------------------------------------------------------------------------------------------------------------------------------------|---------------------------------------------------------------------------------------------------------------------------------------------|-------------------------------------------------------------------------------------------------------------------------------------------|
| <b>Results</b>                                              |         |                                                                                                                                                   |                                                                                                                                             |                                                                                                                                           |
| <b>Participant flow (a diagram is strongly recommended)</b> | 13a     | For each group, the numbers of participants who were randomly assigned, received intended treatment, and were analysed for the primary outcome    | For each group, the numbers of clusters that were randomly assigned, received intended treatment, and were analysed for the primary outcome | Methods:<br>Sample size, paragraph 1;<br>Randomisation and allocation.<br><br>Results:<br>Participants and intervention Delivered; Fig 2. |
|                                                             | 13b     | For each group, losses and exclusions after randomisation, together with reasons                                                                  | For each group, losses and exclusions for both clusters and individual cluster members                                                      | Results:<br>Participants and intervention Delivered; Fig 2.                                                                               |
| <b>Recruitment</b>                                          | 14a     | Dates defining the periods of recruitment and follow-up                                                                                           |                                                                                                                                             | N/A                                                                                                                                       |
|                                                             | 14b     | Why the trial ended or was stopped                                                                                                                |                                                                                                                                             | N/A                                                                                                                                       |
| <b>Baseline data</b>                                        | 15      | A table showing baseline demographic and clinical characteristics for each group                                                                  | Baseline characteristics for the individual and cluster levels as applicable for each group                                                 | Results: Table 1                                                                                                                          |
| <b>Numbers analysed</b>                                     | 16      | For each group, number of participants (denominator) included in each analysis and whether the analysis was by original assigned groups           | For each group, number of clusters included in each analysis                                                                                | Results:<br>Participants and intervention Delivered; Fig 2.                                                                               |
| <b>Outcomes and estimation</b>                              | 17a     | For each primary and secondary outcome, results for each group, and the estimated effect size and its precision (such as 95% confidence interval) | Results at the individual or cluster level as applicable and a coefficient of intracluster correlation (ICC or k) for each primary outcome  | Results:<br>Primary outcome; Table 2; Table 3                                                                                             |
|                                                             | 17b     | For binary outcomes, presentation of both absolute and relative effect sizes is recommended                                                       |                                                                                                                                             | N/A                                                                                                                                       |
| <b>Ancillary analyses</b>                                   | 18      | Results of any other analyses performed, including subgroup analyses and adjusted analyses, distinguishing pre-specified from exploratory         |                                                                                                                                             | Results:<br>Primary outcome, paragraph 2 and paragraph 3                                                                                  |

| Section/Topic            | Item No | Standard Checklist item                                                                                             | Extension for cluster designs                                             | Page No *                                                                  |
|--------------------------|---------|---------------------------------------------------------------------------------------------------------------------|---------------------------------------------------------------------------|----------------------------------------------------------------------------|
| <b>Results (cont'd)</b>  |         |                                                                                                                     |                                                                           |                                                                            |
| <b>Harms</b>             | 19      | All important harms or unintended effects in each group (for specific guidance see CONSORT for harms <sup>1</sup> ) |                                                                           | Results:<br>Process evaluation, paragraph 2.<br>Discussion:<br>paragraph 8 |
| <b>Discussion</b>        |         |                                                                                                                     |                                                                           |                                                                            |
| <b>Limitations</b>       | 20      | Trial limitations, addressing sources of potential bias, imprecision, and, if relevant, multiplicity of analyses    |                                                                           | Discussion:<br>paragraphs 6, 7 and 8                                       |
| <b>Generalisability</b>  | 21      | Generalisability (external validity, applicability) of the trial findings                                           | Generalisability to clusters and/or individual participants (as relevant) | Discussion:<br>paragraphs 5, 9, 10 and 11                                  |
| <b>Interpretation</b>    | 22      | Interpretation consistent with results, balancing benefits and harms, and considering other relevant evidence       |                                                                           | Discussion:                                                                |
| <b>Other information</b> |         |                                                                                                                     |                                                                           |                                                                            |
| <b>Registration</b>      | 23      | Registration number and name of trial registry                                                                      |                                                                           | Methods: Trial registration                                                |
| <b>Protocol</b>          | 24      | Where the full trial protocol can be accessed, if available                                                         |                                                                           | Reference No. 15<br><a href="#">Available online</a>                       |
| <b>Funding</b>           | 25      | Sources of funding and other support (such as supply of drugs), role of funders                                     |                                                                           | Provided                                                                   |

\* Note: page numbers optional depending on journal requirements

Table 2: Extension of CONSORT for abstracts [3] to reports of cluster randomised trials

| Item                      | Standard Checklist item                                                                                     | Extension for cluster trials                                                                                   |
|---------------------------|-------------------------------------------------------------------------------------------------------------|----------------------------------------------------------------------------------------------------------------|
| <b>Title</b>              | Identification of study as randomised                                                                       | <b>Identification of study as cluster randomised</b>                                                           |
| <b>Trial design</b>       | Description of the trial design (e.g. parallel, cluster, non-inferiority)                                   |                                                                                                                |
| <b>Methods</b>            |                                                                                                             |                                                                                                                |
| <b>Participants</b>       | Eligibility criteria for participants and the settings where the data were collected                        | <b>Eligibility criteria for clusters</b>                                                                       |
| <b>Interventions</b>      | Interventions intended for each group                                                                       |                                                                                                                |
| <b>Objective</b>          | Specific objective or hypothesis                                                                            | <b>Whether objective or hypothesis pertains to the cluster level, the individual participant level or both</b> |
| <b>Outcome</b>            | Clearly defined primary outcome for this report                                                             | <b>Whether the primary outcome pertains to the cluster level, the individual participant level or both</b>     |
| <b>Randomization</b>      | How participants were allocated to interventions                                                            | <b>How clusters were allocated to interventions</b>                                                            |
| <b>Blinding (masking)</b> | Whether or not participants, care givers, and those assessing the outcomes were blinded to group assignment |                                                                                                                |
| <b>Results</b>            |                                                                                                             |                                                                                                                |
| <b>Numbers randomized</b> | Number of participants randomized to each group                                                             | <b>Number of clusters randomized to each group</b>                                                             |
| <b>Recruitment</b>        | Trial status <sup>1</sup>                                                                                   |                                                                                                                |
| <b>Numbers analysed</b>   | Number of participants analysed in each group                                                               | <b>Number of clusters analysed in each group</b>                                                               |
| <b>Outcome</b>            | For the primary outcome, a result for each group and the estimated effect size and its precision            | <b>Results at the cluster or individual participant level as applicable for each primary outcome</b>           |
| <b>Harms</b>              | Important adverse events or side effects                                                                    |                                                                                                                |
| <b>Conclusions</b>        | General interpretation of the results                                                                       |                                                                                                                |
| <b>Trial registration</b> | Registration number and name of trial register                                                              |                                                                                                                |
| <b>Funding</b>            | <b>Source of funding</b>                                                                                    |                                                                                                                |

<sup>1</sup> Relevant to Conference Abstracts

## REFERENCES

1. Hopewell S, Clarke M, Moher D, Wager E, Middleton P, Altman DG, et al. CONSORT for reporting randomised trials in journal and conference abstracts. *Lancet*. 2008; 371: 281-283
  2. Hopewell S, Clarke M, Moher D, Wager E, Middleton P, Altman DG at al. CONSORT for reporting randomized controlled trials in journal and conference abstracts: explanation and elaboration. *PLoS Med*. 2008; 5(1): e20.
  3. Ioannidis JP, Evans SJ, Gotzsche PC, O'Neill RT, Altman DG, Schulz K, Moher D. Better reporting of harms in randomized trials: an extension of the CONSORT statement. *Ann Intern Med*. 2004; 141(10): 781-788.
-
